# Supplementary material for: Characterization of gut microbiomes of household pets in the United States using a direct-to-consumer approach
Source: PubMed Central journal article supplement (PMC7032713; doi:10.1371/journal.pone.0227289), 2020-02-20
Supplement: pone.0227289.s013.pdf [file pone.0227289.s013.pdf]

## Survey questionnaire

SampleID: \_\_\_\_\_

Date: \_\_\_\_\_

Pet\_type:  Dog  Cat

Gender:  Male  Female

Pet's birthday: \_\_\_\_\_

Breed: \_\_\_\_\_

Is your dog a puppy?  Yes  No

State of residence: \_\_\_\_\_

Current weight of your pet (in lbs): \_\_\_\_\_

Is your pet currently overweight?  Yes  No

Home environment:  Rural  Suburban  Urban

How was the pet acquired?  Breeder  Rescue/Adoption  Other

If other, specify: \_\_\_\_\_

How would you describe the overall health of your pet?

Excellent  Good  Fair  Poor

How would you describe the activity level of your pet?

Very active  Active  Average activity  Somewhat  Not active

Has your pet been bred?  Yes  No  I am not sure

Is your pet spayed?  Yes  No, the pet is intact  I am not sure

Does your pet have breeding related issues?  Yes  No
